# Supplementary material for: An automated microfluidic DNA microarray platform for genetic variant detection in inherited arrhythmic diseases
Source: Royal Society of Chemistry journal article supplement (doi:10.1039/c7an01648d), 2018-01-01
Supplement: c7an01648d1.pdf [file c7an01648d1.pdf]

## Supplemental Information

### **An Automated Microfluidic DNA Microarray Platform for Genetic Variants Detection in Inherited Arrhythmic Diseases**

Shu-Hong Huang,<sup>1\*</sup> Yu-Shin Chang,<sup>1\*</sup> Jyh-Ming Jimmy Juang,<sup>2</sup> Kai-Wei Chang,<sup>1</sup> Mong-Hsun Tsai,<sup>3</sup> Tzu-Pin Lu,<sup>4</sup> Liang-Chuan Lai,<sup>5</sup> Eric Y Chuang,<sup>1,6</sup> Nien-Tsu Huang<sup>1,6</sup>

<sup>1</sup>*Graduate Institute of Biomedical Electronics and Bioinformatics, National Taiwan University, Taipei, Taiwan,*

<sup>2</sup>*Cardiovascular Center and Division of Cardiology, Department of Internal Medicine, National Taiwan University Hospital, National Taiwan University College of Medicine, Taipei, Taiwan*

<sup>3</sup>*Institute of Biotechnology, National Taiwan University, Taipei, Taiwan,*

<sup>4</sup>*Institute of Epidemiology and Preventive Medicine, Department of Public Health, National Taiwan University*

<sup>5</sup>*Graduate Institute of Physiology, National Taiwan University College of Medicine, Taipei, Taiwan*

<sup>6</sup>*Department of Electrical Engineering, National Taiwan University, Taipei, Taiwan*

\*S.H. Huang and Y.H. Chang equally contributed to this work.

**A**

Conventional Method (18h)

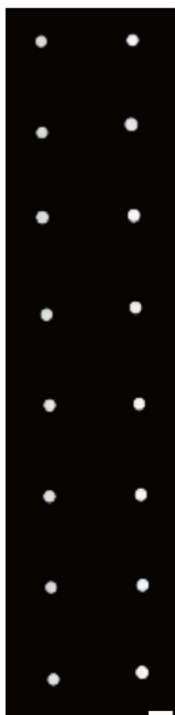

Exon12 MU WT

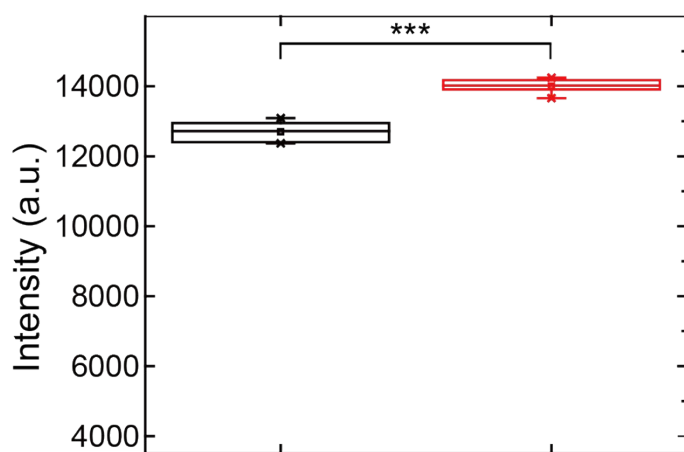

Exon12 MU

WT

**B**

Microfluidic Method (3h)

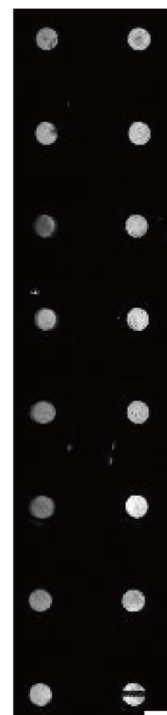

Exon12 MU WT

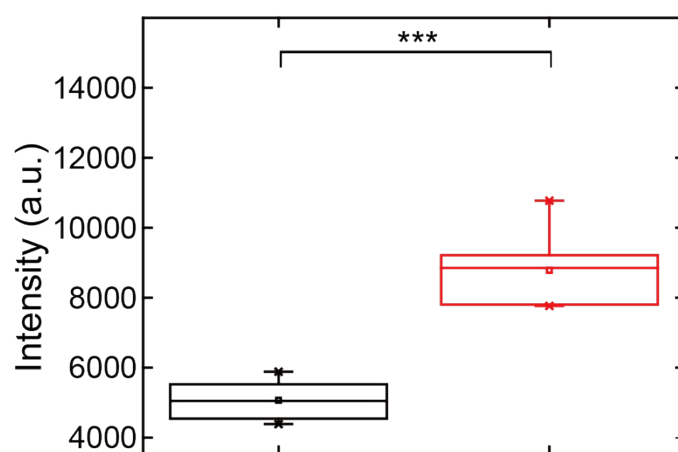

Exon12 MU

WT

Figure S1 Comparison between (A) the conventional and (B) the microfluidic hybridization method using CY3 labeled oligonucleotide exon 12 WT as the target DNA sample. The graph below each figure shows the average fluorescent intensity of each column. Both methods can achieve a significant hybridization signal differentiation with  $p\text{-value} < 0.001$ . Scale bar: 100  $\mu\text{m}$

A

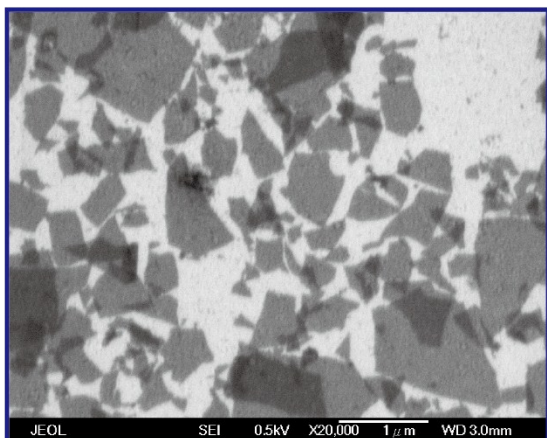

B

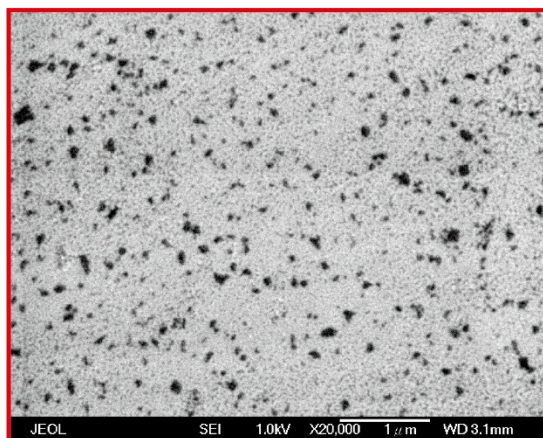

C

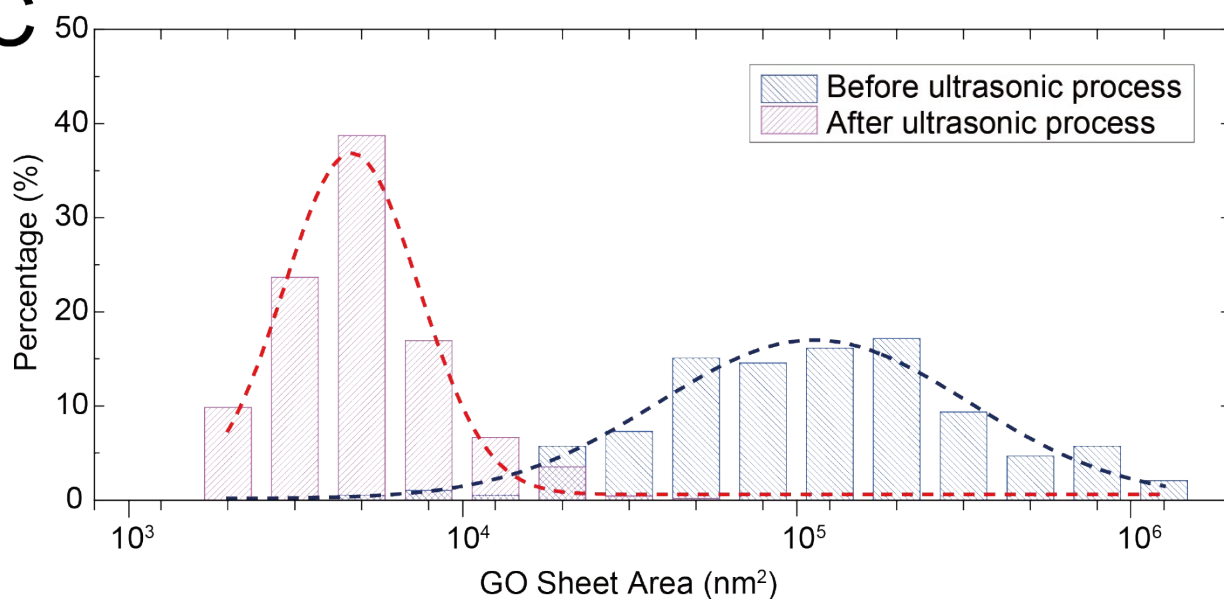

Figure S2 SEM image of a GO sheet (A) before the ultrasonic process and (B) after the 3-hour ultrasonic process. Scale bar: 1  $\mu\text{m}$ . (C) The histogram and Gauss fitting curve of the area distribution indicate the GO sheet area is between  $2 \times 10^4$  to  $1.2 \times 10^6 \text{ nm}^2$  and  $2 \times 10^3$  to  $2 \times 10^4 \text{ nm}^2$  before and after the ultrasonic process, respectively.

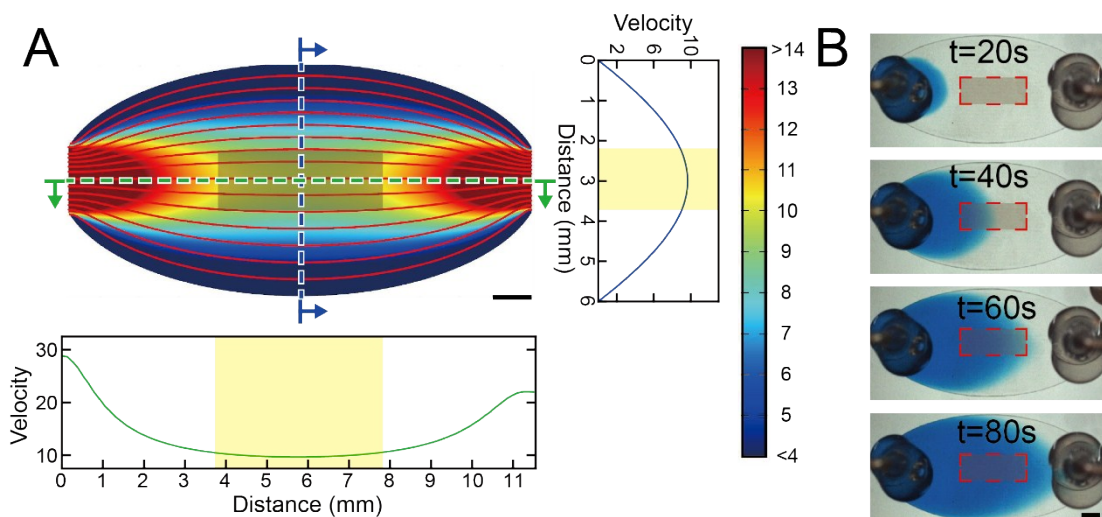

Figure S3 Finite element simulation of elliptical microchannel without pillar array. (A) Velocity field and flow streamline profile in the elliptical microchannel. The side and bottom figures show the detailed velocity profiles along the blue axis and green axis. The yellow section represents the designed hybridization area with only a 10% velocity difference. (B) Temporal sequence of photos showing the uniform flow pattern in the designed hybridization area. Scale bar: 1 mm.

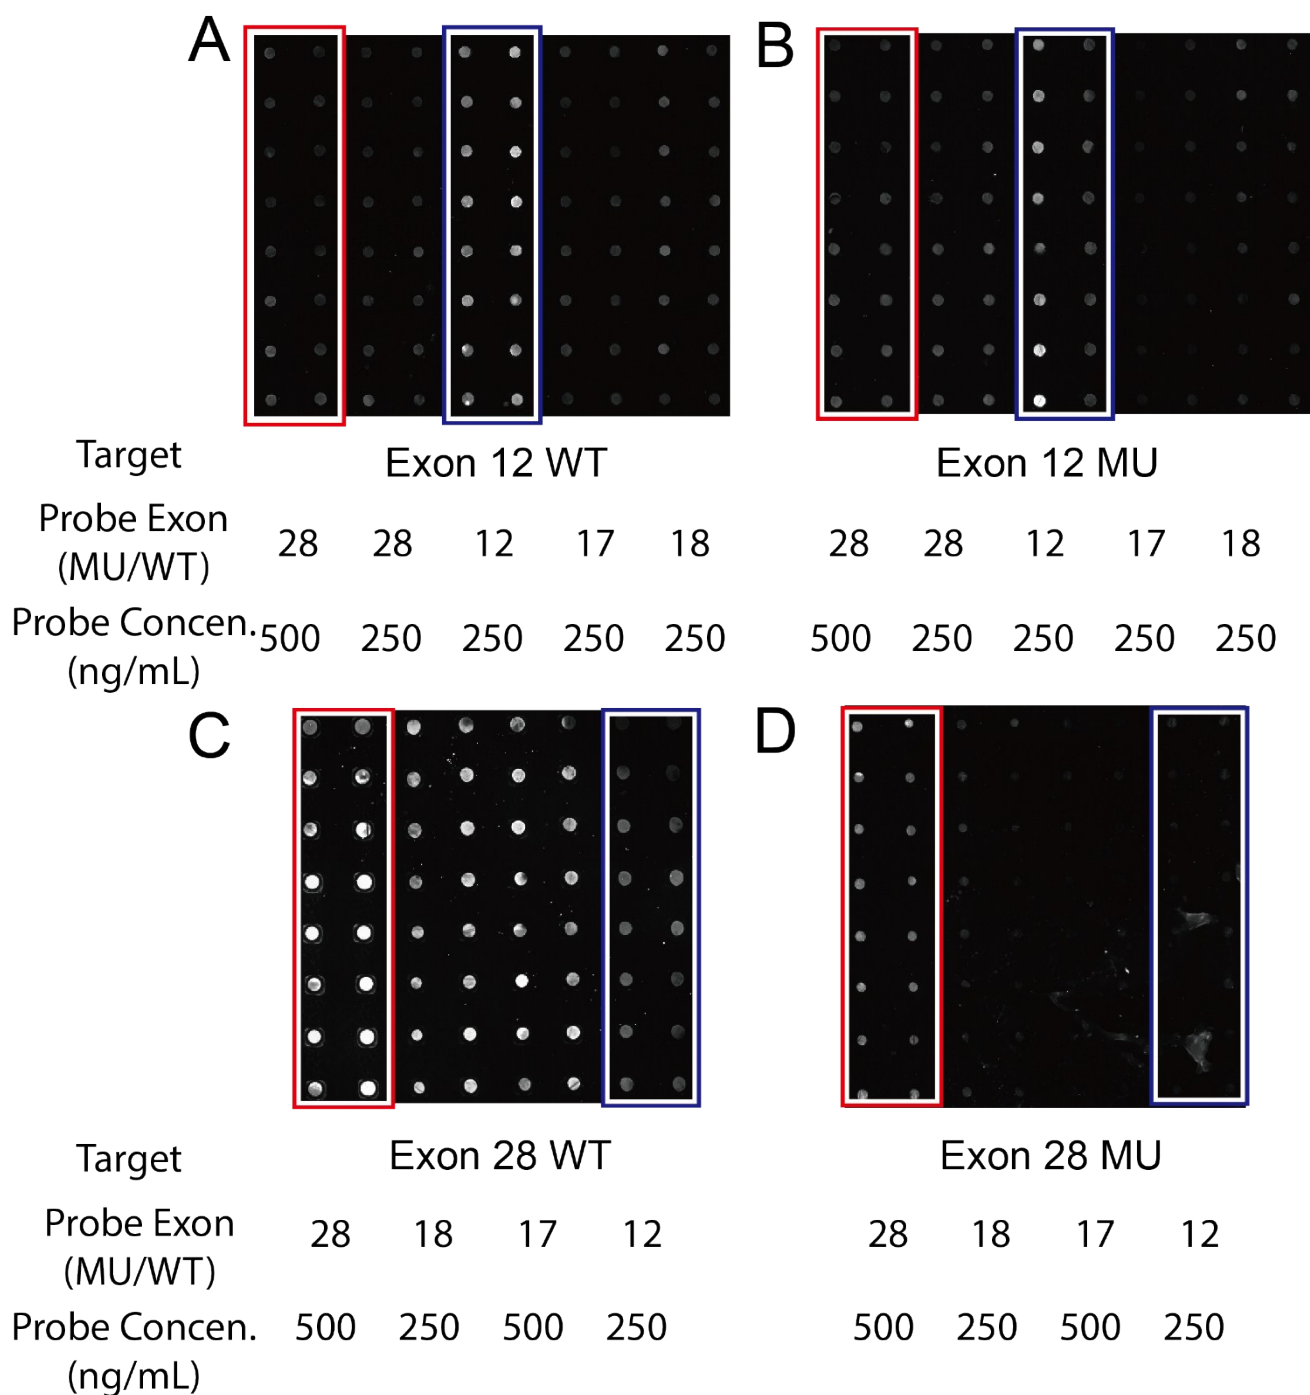

Figure S4 Complete microarray hybridization image from Fig. 6 with detailed probe information.
